# Supplementary material
Source: Springer Nature journal article supplement (https://www.springermedizin.de/resource/supplementary/12884_2011_483_MOESM9_ESM.pdf/9457918)

WHO-criteria

|              | GDM        |             | Non-GDM     |              |
|--------------|------------|-------------|-------------|--------------|
|              | Events     | Total       | Events      | Total        |
| Aberg 2001   | 18         | 129         | 357         | 4503         |
| EBDG 2001    | 151        | 321         | 1498        | 4024         |
| HAPO 2008    | 564        | 2314        | 3167        | 18418        |
| Sugaya 2000  | 9          | 55          | 36          | 281          |
| <b>Total</b> | <b>742</b> | <b>2819</b> | <b>5058</b> | <b>27226</b> |

Heterogeneity:  $Q=3.6$ ,  $p=0.302$ ;  $I^2=29\%$   
 Overall effect:  $p<0.001$

|              | RR          | 95%-CI              | Weight      |
|--------------|-------------|---------------------|-------------|
| Aberg 2001   | 1.76        | [1.13; 2.73]        | 4.8%        |
| EBDG 2001    | 1.26        | [1.12; 1.43]        | 37.2%       |
| HAPO 2008    | 1.42        | [1.31; 1.53]        | 55.8%       |
| Sugaya 2000  | 1.28        | [0.65; 2.50]        | 2.2%        |
| <b>Total</b> | <b>1.37</b> | <b>[1.24; 1.51]</b> | <b>100%</b> |

IADPSG-criteria

|              |             |             |             |              |
|--------------|-------------|-------------|-------------|--------------|
| Black 2010   | 336         | 1691        | 1112        | 7020         |
| EBDG 2001    | 309         | 801         | 1340        | 3544         |
| HAPO 2008    | 813         | 3338        | 2918        | 17394        |
| <b>Total</b> | <b>1458</b> | <b>5830</b> | <b>5370</b> | <b>27958</b> |

Heterogeneity:  $Q=34.1$ ,  $p<0.001$ ;  $I^2=93\%$   
 Overall effect:  $p=0.044$

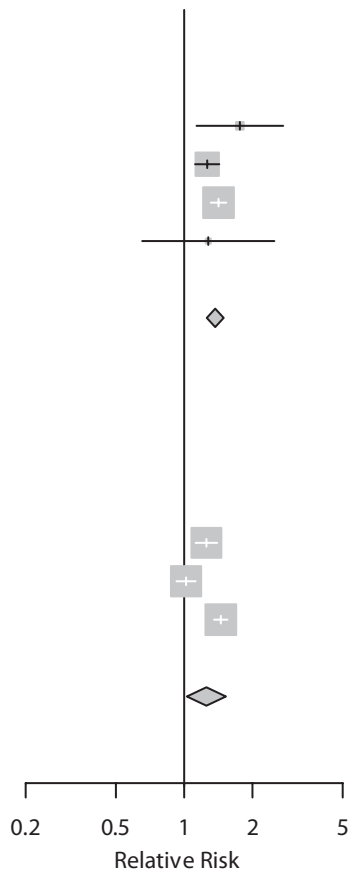

Supplement: MOESM9 [file 9457918]
